# Supplementary material
Source: HighWire-hosted journal article supplement (https://bmjopen.bmj.com/content/10/2/e033547)

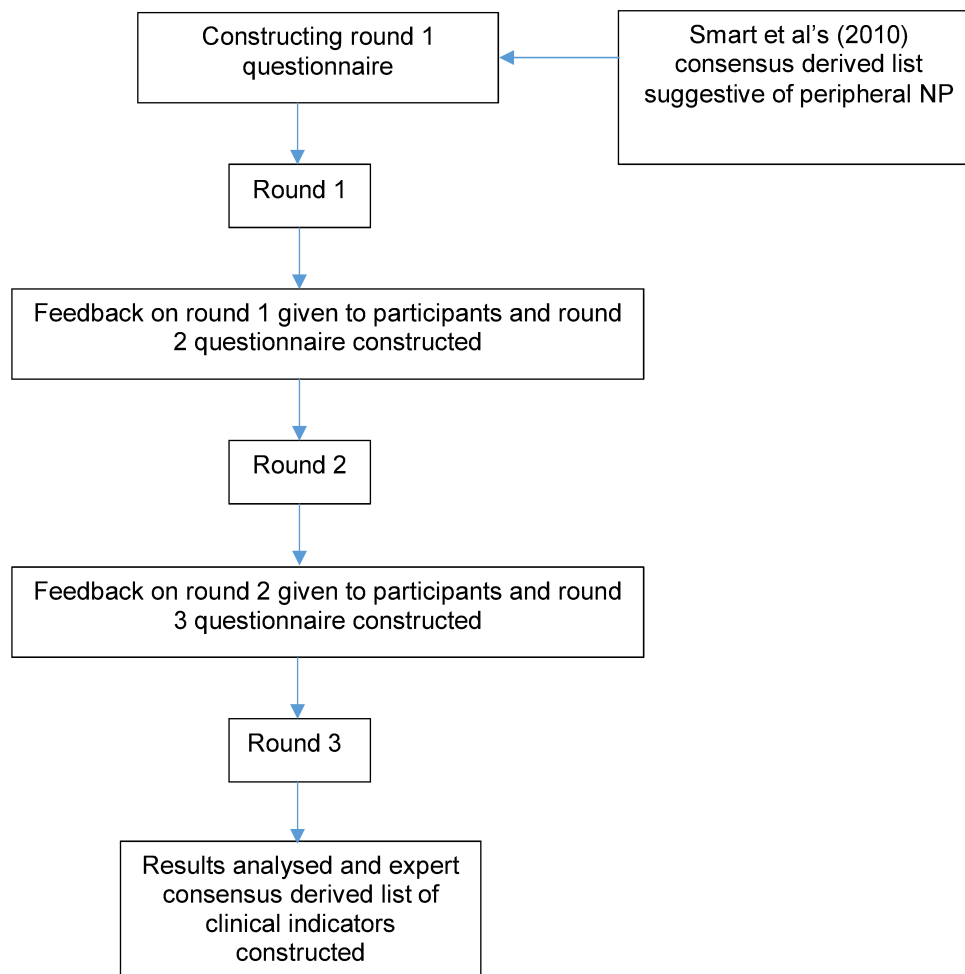

**Figure 1.** Modified Delphi processes to construct list of clinical indicators

Supplement: inline-supplementary-material-1 [file inline-supplementary-material-1.pdf]

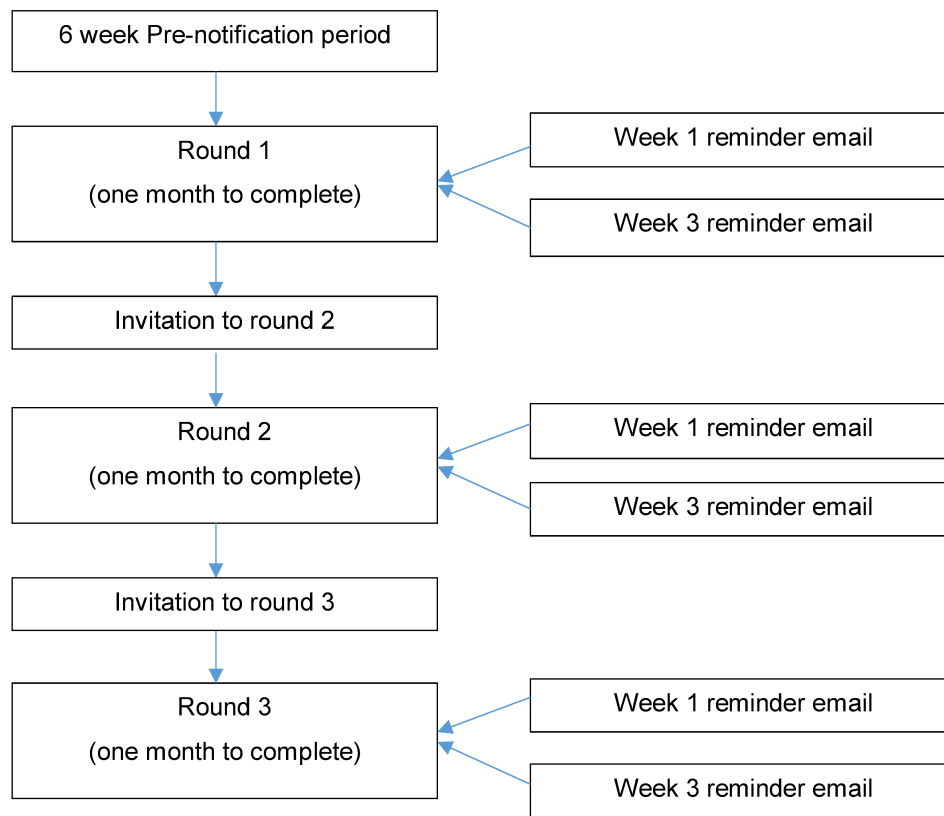

**Figure 2.** Procedure and timelines for participants in Delphi study.

Supplement: inline-supplementary-material-2 [file inline-supplementary-material-2.pdf]
